# Supplementary material for: Sediment Facilitates Microbial Degradation of the Herbicides Endothall Monoamine Salt and Endothall Dipotassium Salt in an Aquatic Environment
Source: Int J Environ Res Public Health. 2018 Oct 15;15(10):2255. doi: 10.3390/ijerph15102255 (PMC6211108; doi:10.3390/ijerph15102255)
Supplement: Supplementary File 1 [file ijerph-15-02255-s001.xlsx]

## Sheet: Endothall mg per L
Mesocosm number	Treatment Number	Peak1Day0	Peak1Day1	Peak1Day3	Peak1Day5	Peak1Day7	Peak1Day9	Peak1Day11	Peak1Day16	Peak1Day21	Peak2Day0	Peak2Day1	Peak2Day3	Peak2Day5	Peak2Day7	Peak2Day9	Peak2Day11	Peak2Day16	Peak2Day21
10_1	10	3.10806	2.95988	2.87256	2.89002	0.192461	0.182882	0.11495	0.115119	0.196039	1.05093	0.993269	1.00087	1.02412	1.21095	1.1801	1.16417	0.83019	0.154671
10_2	10	3.00645	2.96642	2.89327	2.86618	0.298234	0.181108	0.195636	0.189707	0.171582	0.983663	0.978721	1.00033	1.00035	1.11692	1.08526	1.0927	1.11718	0.537849
10_3	10	2.98564	2.8394	2.82873	2.81114	0.285507	0.188211	0.206064	0.127372	0.183347	0.998262	1.04714	0.979348	1.02889	1.13994	1.14556	1.16226	1.16697	0.776577
11_1	11	2.98997	2.87402	2.65477	2.49824	2.47439	0.562519	0.147797	0.127012	0.104982	1.00367	0.973826	0.963418	0.950626	0.985268	1.02287	0.878569	0.524497	0.0182733
11_2	11	2.9831	2.83522	2.64707	2.50688	2.46791	1.39309	0.152203	0.133452	0.107527	0.996909	0.975645	0.975314	0.973128	0.969198	0.962412	0.950508	0.549651	0.460001
11_3	11	3.10273	2.9716	2.71552	2.59253	2.42271	0.152091	0.141726	0.140886	0.119362	1.02621	0.939141	0.996769	1.00755	0.998117	0.957001	0.856261	0.543397	0.502738
12_1	12	2.93808	2.73012	2.32117	2.10008	2.00067	1.83444	1.72779	0.139559	0.105181	0.992467	1.00494	0.969025	0.971123	0.96332	1.00162	0.999621	1.04804	0.49989
12_2	12	3.03568	2.78031	2.47315	2.26376	2.11684	1.30886	0.171864	0.147696	0.123311	1.02045	1.01377	0.994436	0.972398	0.993262	0.977543	1.00523	0.713865	0.454381
12_3	12	2.92574	2.78945	2.36237	2.18227	2.01628	0.160529	0.128369	0.119999	0.0968238	0.995421	1.00786	0.948057	0.9692	0.977115	0.985264	0.972163	0.542388	0.39085
13_1	13	2.54947	2.4428	2.4816	2.54859	2.52505	2.72375	2.77112	3.05266	3.09461	0.0132914	0.0107716	0.0121495	0.0106293	0.0124513	0.012425	0.0126623	0.0142667	0.0143516
13_2	13	2.55334	2.58464	2.51482	2.51832	2.59498	2.83164	2.89009	2.99308	3.10302	0.0118792	0.0100159	0.0139902	0.011939	0.0121481	0.0123913	0.0124291	0.0111397	0.0148806
13_3	13	2.47742	2.55661	2.52885	2.51453	2.5817	2.68896	2.87926	3.08441	3.09634	0.00978431	0.0109777	0.0104433	0.0111029	0.0115891	0.0111257	0	0.0141201	0.0126669
14_1	14	2.4984	2.51489	2.56499	2.55355	2.63157	2.84792	2.8868	2.89676	2.07096	0.0099909	0.0107446	0.0106151	0.0109002	0.0104286	0.0141087	0.0121618	0.00890948	0.00627881
14_2	14	2.49807	2.50451	2.47993	2.51653	2.57458	2.73687	2.83803	2.83202	1.70998	0.00980885	0.0100797	0.0101298	0.0115857	0.0119498	0.0115593	0.0127032	0.0176667	0.00463658
14_3	14	2.47063	2.50167	2.42697	2.5242	2.50301	2.69276	2.80851	2.91981	2.79083	0.0123856	0.00826212	0.011044	0.0129273	0.0119739	0.0114236	0.0140035	0.0131694	0.00606744
15_1	15	2.38768	2.46523	2.50372	2.51397	2.54358	2.7287	2.86996	3.01911	3.07494	0.0103516	0.0111789	0.0125603	0.0124665	0.0130579	0.0128881	0.0154799	0.0152867	0.0136222
15_2	15	2.55217	2.53953	2.47419	2.52429	2.53995	2.80704	2.8274	3.03429	3.19848	0.0101975	0.0113335	0.0117737	0.0127031	0.0118473	0.0138502	0.0137761	0.0146827	0.0142558
15_3	15	2.54026	2.52935	2.5152	2.53094	2.61429	2.76139	2.84479	2.98897	3.08273	0.0114797	0.0115028	0.0122325	0.0104237	0.010989	0.0135321	0.0142387	0.0176247	0.0165855
16_1	16	2.37009	2.39819	2.30142	2.21358	1.35005	0.0593383	0.0590021	0.0637957	0.0574215	0.0112618	0.0103835	0.0110018	0.0119111	0.103456	0.138979	0.134309	0.111952	0.00479717
16_2	16	2.38347	2.33801	2.32902	2.29424	2.36356	0.39935	0.0662191	0.0664693	0.0576143	0.0103835	0.0119032	0.011096	0.0120931	0.0135657	0.113047	0.122302	0.102765	0.000640832
16_3	16	2.15146	2.30916	2.24859	2.22231	2.35207	0.102498	0.0625767	0.0644836	0.0624705	0.00852465	0.0104424	0.00934071	0.0112128	0.0160964	0.174374	0.00401491	0.0705537	0.000316012
17_1	17	2.07396	2.14548	2.00269	1.86737	1.45861	0.0489161	0.0414676	0.0336263	0.0263192	0.00974505	0.0119042	0.0130215	0.0171744	0.031337	0.0482727	0.0510759	0.017089	0.0121427
17_2	17	2.23373	2.23145	2.06577	1.95173	1.83645	0.201547	0.0471848	0.034967	0.0272781	0.0135574	0.0124376	0.0154368	0.0176009	0.0256281	0.0509526	0.04587	0.0101803	0.0110009
17_3	17	2.4033	2.26685	2.14321	2.04098	1.36088	0.06095	0.0467818	0.035799	0.0293146	0.00979167	0.0122938	0.0149932	0.0178816	0.0368139	0.0507537	0.049731	0.00893486	0.0032368
18_1	18	2.35263	2.05761	1.92017	1.66829	1.62963	1.54753	1.45982	0.482224	0.0302455	0.0104252	0.0112967	0.0130755	0.0145997	0.0187483	0.0207579	0.0248096	0.0395363	0.0111407
18_2	18	2.07363	2.05415	1.87361	1.63306	1.62977	1.37683	0.572571	0.0336761	0.0215733	0.00862132	0.0114699	0.0131148	0.013792	0.0204113	0.0276361	0.0417634	0.0392596	0.0110325
18_3	18	2.37664	2.07972	1.86807	1.62027	1.56502	1.02181	0.26098	0.0274558	0.0203341	0.0107176	0.0123375	0.0136909	0.0152533	0.0193073	0.0294451	0.0384364	0.00879395	0.000548618
22_1	22	3.09883	2.96618	2.54736	0.196883	0.162512	0.15837	0.158232	0.125221	0.161985	1.02104	1.01671	0.97631	0.611187	0.426159	0.102425	0.000130275	0.000131433	0
22_2	22	3.16532	3.06971	2.65415	0.259889	0.16415	0.157436	0.11443	0.170176	0.161041	1.0186	1.00702	0.940761	0.657667	0.621389	0.422799	0.000116726	0.000305646	0
22_3	22	3.06094	3.00358	2.56606	0.17453	0.161924	0.112139	0.170603	0.1269	0.13371	1.02033	1.03467	0.977811	0.639239	0.544936	0	0.0163479	0	0.000152565
23_1	23	3.03914	2.90779	2.47729	1.95316	1.24096	0.170356	0.139777	0.120243	0.100571	1.03169	0.9978	0.979697	0.95002	0.811629	0.39322	0.00152578	0	0
23_2	23	3.03147	2.83853	2.53998	1.93159	1.34397	0.192693	0.139277	0.130471	0.104986	1.01317	1.00553	0.976282	0.942019	0.817007	0.379794	0.00113912	0	0
23_3	23	3.07662	2.91594	2.48775	1.88657	1.30071	0.468176	0.139368	0.123829	0.101122	1.01899	0.963187	0.995281	0.948234	0.836749	0.380134	0.00191973	0	0.000136072
24_1	24	2.95876	2.74111	2.33753	0.161038	0.134421	0.126247	0.127541	0.118746	0.103055	1.01701	0.985731	0.9893	0.956241	0.644661	0.128603	0	0	0.000151019
24_2	24	3.21455	2.74473	2.09883	0.146228	0.136503	0.129438	0.128807	0.113603	0.0916345	1.07682	1.01642	1.00124	0.930116	0.543707	0.143051	0.000121937	0	0.000185552
24_3	24	3.14483	2.74073	2.41331	1.87041	1.22982	0.429127	0.145836	0.118875	0.0962445	1.0443	1.00864	0.998252	0.961265	0.934184	0.72949	0.121217	0	0
7_1	7	2.94793	3.14865	3.00792	3.02303	3.11606	3.24185	3.16615	3.66682	3.7585	0.957203	1.01843	0.983184	1.03131	1.01675	1.0558	1.01706	1.18189	1.24722
7_2	7	2.95837	3.27065	3.09555	3.19087	3.24396	3.2806	3.30652	3.50097	3.52137	1.00585	1.09959	1.02988	1.05316	1.08081	1.08338	1.0592	1.13899	1.18906
7_3	7	3.14643	3.29393	3.15451	3.19549	3.24456	3.2541	3.17647	3.55577	3.76131	1.0284	1.08439	1.04145	1.06497	1.07599	1.07903	1.03646	1.18368	1.24148
8_1	8	3.07938	3.20184	3.12285	3.20028	3.18045	3.31701	3.14631	3.39652	3.64975	1.00177	1.06794	1.05261	1.06664	1.05446	1.09441	1.01679	1.12322	1.22135
8_2	8	3.0989	3.20469	3.09058	3.17144	3.23784	3.26173	3.34012	3.42204	3.6561	0.989822	1.06177	1.04575	1.06439	1.07252	1.07294	1.0799	1.13491	1.17968
8_3	8	3.11239	3.37509	3.05881	3.15962	3.22309	3.20557	3.13753	3.55267	3.65138	1.01162	1.06871	1.04455	1.05326	1.08448	1.08123	1.03917	1.15421	1.23885
9_1	9	3.08917	3.21873	3.02471	3.11638	3.20595	3.2202	3.27393	3.46344	3.54338	0.992988	1.02767	1.02041	1.03699	1.06398	1.06589	1.06355	1.13654	1.21979
9_2	9	3.09408	3.32139	3.0827	3.12237	3.19991	3.20584	3.16734	3.39705	3.5939	1.01118	1.09574	1.0568	1.04153	1.06739	1.06655	1.07208	1.11037	1.21737
9_3	9	3.18346	3.23013	3.11292	3.23844	3.27856	3.28072	3.34404	3.58476	3.73577	1.052	1.05715	1.03279	1.10192	1.10054	1.11793	1.14186	1.17236	1.29274
